# Supplementary material for: Comparative Analysis of Glycogene Expression in Different Mouse Tissues Using RNA-Seq Data
Source: Hindawi journal article supplement (doi:10.1155/2014/837365), 2014-01-01
Supplement: f1 [file 837365.f1.pdf]

| <b>Pathway Name</b>                                              | <b>No. of Mapped Genes</b> |
|------------------------------------------------------------------|----------------------------|
| 04142 Lysosome                                                   | 33                         |
| 04151 PI3K-Akt signaling pathway                                 | 26                         |
| 04060 Cytokine-cytokine receptor interaction                     | 23                         |
| 04141 Protein processing in endoplasmic reticulum                | 17                         |
| 05205 Proteoglycans in cancer                                    | 17                         |
| 04610 Complement and coagulation cascades                        | 15                         |
| 04514 Cell adhesion molecules CAMs                               | 14                         |
| 04510 Focal adhesion                                             | 14                         |
| 04512 ECM-receptor interaction                                   | 13                         |
| 04145 Phagosome                                                  | 13                         |
| 05200 Pathways in cancer                                         | 13                         |
| 04630 Jak-STAT signaling pathway                                 | 11                         |
| 05150 Staphylococcus aureus infection                            | 11                         |
| 05166 HTLV-I infection                                           | 11                         |
| 00510 N-Glycan biosynthesis                                      | 10                         |
| 04014 Ras signaling pathway                                      | 10                         |
| 04015 Rap1 signaling pathway                                     | 10                         |
| 04640 Hematopoietic cell lineage                                 | 10                         |
| 05152 Tuberculosis                                               | 9                          |
| 00564 Glycerophospholipid metabolism                             | 8                          |
| 04380 Osteoclast differentiation                                 | 8                          |
| 05322 Systemic lupus erythematosus                               | 8                          |
| 05133 Pertussis                                                  | 8                          |
| 05168 Herpes simplex infection                                   | 8                          |
| 05144 Malaria                                                    | 8                          |
| 04144 Endocytosis                                                | 7                          |
| 04670 Leukocyte transendothelial migration                       | 7                          |
| 05164 Influenza A                                                | 7                          |
| 00561 Glycerolipid metabolism                                    | 6                          |
| 00531 Glycosaminoglycan degradation                              | 6                          |
| 04668 TNF signaling pathway                                      | 6                          |
| 04066 HIF-1 signaling pathway                                    | 6                          |
| 04976 Bile secretion                                             | 6                          |
| 04974 Protein digestion and absorption                           | 6                          |
| 05202 Transcriptional misregulation in cancers                   | 6                          |
| 05203 Viral carcinogenesis                                       | 6                          |
| 05160 Hepatitis C                                                | 6                          |
| 05142 Chagas disease American trypanosomiasis                    | 6                          |
| 00513 Various types of N-glycan biosynthesis                     | 5                          |
| 00534 Glycosaminoglycan biosynthesis - heparan sulfate / heparin | 5                          |
| 04010 MAPK signaling pathway                                     | 5                          |
| 04064 NF-kappa B signaling pathway                               | 5                          |
| 04020 Calcium signaling pathway                                  | 5                          |
| 04810 Regulation of actin cytoskeleton                           | 5                          |
| 04650 Natural killer cell mediated cytotoxicity                  | 5                          |
| 04913 Ovarian Steroidogenesis                                    | 5                          |
| 04614 Renin-angiotensin system                                   | 5                          |
| 04975 Fat digestion and absorption                               | 5                          |
| 05222 Small cell lung cancer                                     | 5                          |

|                                                                  |   |
|------------------------------------------------------------------|---|
| 04932 Non-alcoholic fatty liver disease NAFLD                    | 5 |
| 05162 Measles                                                    | 5 |
| 05145 Toxoplasmosis                                              | 5 |
| 00565 Ether lipid metabolism                                     | 4 |
| 00600 Sphingolipid metabolism                                    | 4 |
| 00230 Purine metabolism                                          | 4 |
| 00512 Mucin type O-glycan biosynthesis                           | 4 |
| 00604 Glycosphingolipid biosynthesis - ganglio series            | 4 |
| 00511 Other glycan degradation                                   | 4 |
| 00983 Drug metabolism - other enzymes                            | 4 |
| 02010 ABC transporters                                           | 4 |
| 04310 Wnt signaling pathway                                      | 4 |
| 04350 TGF-beta signaling pathway                                 | 4 |
| 04080 Neuroactive ligand-receptor interaction                    | 4 |
| 04520 Adherens junction                                          | 4 |
| 04620 Toll-like receptor signaling pathway                       | 4 |
| 04612 Antigen processing and presentation                        | 4 |
| 04920 Adipocytokine signaling pathway                            | 4 |
| 03320 PPAR signaling pathway                                     | 4 |
| 04915 Estrogen signaling pathway                                 | 4 |
| 04977 Vitamin digestion and absorption                           | 4 |
| 04360 Axon guidance                                              | 4 |
| 05206 MicroRNAs in cancer                                        | 4 |
| 05215 Prostate cancer                                            | 4 |
| 05323 Rheumatoid arthritis                                       | 4 |
| 05010 Alzheimer's disease                                        | 4 |
| 05410 Hypertrophic cardiomyopathy HCM                            | 4 |
| 05416 Viral myocarditis                                          | 4 |
| 05161 Hepatitis B                                                | 4 |
| 05169 Epstein-Barr virus infection                               | 4 |
| 05146 Amoebiasis                                                 | 4 |
| 00100 Steroid biosynthesis                                       | 3 |
| 00603 Glycosphingolipid biosynthesis - globo series              | 3 |
| 04012 ErbB signaling pathway                                     | 3 |
| 04390 Hippo signaling pathway                                    | 3 |
| 04146 Peroxisome                                                 | 3 |
| 04530 Tight junction                                             | 3 |
| 04666 Fc gamma R-mediated phagocytosis                           | 3 |
| 04910 Insulin signaling pathway                                  | 3 |
| 04918 Thyroid hormone synthesis                                  | 3 |
| 04270 Vascular smooth muscle contraction                         | 3 |
| 05218 Melanoma                                                   | 3 |
| 05020 Prion diseases                                             | 3 |
| 05412 Arrhythmogenic right ventricular cardiomyopathy ARVC       | 3 |
| 05414 Dilated cardiomyopathy DCM                                 | 3 |
| 05120 Epithelial cell signaling in Helicobacter pylori infection | 3 |
| 05100 Bacterial invasion of epithelial cells                     | 3 |
| 00030 Pentose phosphate pathway                                  | 2 |
| 00052 Galactose metabolism                                       | 2 |
| 00500 Starch and sucrose metabolism                              | 2 |

|                                                                    |   |
|--------------------------------------------------------------------|---|
| 00140 Steroid hormone biosynthesis                                 | 2 |
| 00590 Arachidonic acid metabolism                                  | 2 |
| 00240 Pyrimidine metabolism                                        | 2 |
| 00480 Glutathione metabolism                                       | 2 |
| 00514 Other types of O-glycan biosynthesis                         | 2 |
| 00532 Glycosaminoglycan biosynthesis - chondroitin sulfate / derma | 2 |
| 00533 Glycosaminoglycan biosynthesis - keratan sulfate             | 2 |
| 00563 Glycosylphosphatidylinositol GPI -anchor biosynthesis        | 2 |
| 00740 Riboflavin metabolism                                        | 2 |
| 00900 Terpenoid backbone biosynthesis                              | 2 |
| 00627 Aminobenzoate degradation                                    | 2 |
| 03013 RNA transport                                                | 2 |
| 04370 VEGF signaling pathway                                       | 2 |
| 04210 Apoptosis                                                    | 2 |
| 04672 Intestinal immune network for IgA production                 | 2 |
| 04062 Chemokine signaling pathway                                  | 2 |
| 04916 Melanogenesis                                                | 2 |
| 04972 Pancreatic secretion                                         | 2 |
| 04978 Mineral absorption                                           | 2 |
| 04724 Glutamatergic synapse                                        | 2 |
| 04727 GABAergic synapse                                            | 2 |
| 04725 Cholinergic synapse                                          | 2 |
| 04728 Dopaminergic synapse                                         | 2 |
| 04722 Neurotrophin signaling pathway                               | 2 |
| 05210 Colorectal cancer                                            | 2 |
| 05214 Glioma                                                       | 2 |
| 05221 Acute myeloid leukemia                                       | 2 |
| 05220 Chronic myeloid leukemia                                     | 2 |
| 05211 Renal cell carcinoma                                         | 2 |
| 05219 Bladder cancer                                               | 2 |
| 05213 Endometrial cancer                                           | 2 |
| 05321 Inflammatory bowel disease IBD                               | 2 |
| 05014 Amyotrophic lateral sclerosis ALS                            | 2 |
| 05132 Salmonella infection                                         | 2 |
| 05140 Leishmaniasis                                                | 2 |
| 05143 African trypanosomiasis                                      | 2 |
| 01200 Carbon metabolism                                            | 1 |
| 01212 Fatty acid metabolism                                        | 1 |
| 01230 Biosynthesis of amino acids                                  | 1 |
| 00010 Glycolysis / Gluconeogenesis                                 | 1 |
| 00040 Pentose and glucuronate interconversions                     | 1 |
| 00051 Fructose and mannose metabolism                              | 1 |
| 00562 Inositol phosphate metabolism                                | 1 |
| 00680 Methane metabolism                                           | 1 |
| 00062 Fatty acid elongation                                        | 1 |
| 01040 Biosynthesis of unsaturated fatty acids                      | 1 |
| 00330 Arginine and proline metabolism                              | 1 |
| 00440 Phosphonate and phosphinate metabolism                       | 1 |
| 00601 Glycosphingolipid biosynthesis - lacto and neolacto series   | 1 |
| 00780 Biotin metabolism                                            | 1 |

|                                                    |   |
|----------------------------------------------------|---|
| 00790 Folate biosynthesis                          | 1 |
| 00860 Porphyrin and chlorophyll metabolism         | 1 |
| 00944 Flavone and flavonol biosynthesis            | 1 |
| 00232 Caffeine metabolism                          | 1 |
| 00363 Bisphenol degradation                        | 1 |
| 00980 Metabolism of xenobiotics by cytochrome P450 | 1 |
| 03060 Protein export                               | 1 |
| 02020 Two-component system                         | 1 |
| 04330 Notch signaling pathway                      | 1 |
| 04391 Hippo signaling pathway -fly                 | 1 |
| 04150 mTOR signaling pathway                       | 1 |
| 04110 Cell cycle                                   | 1 |
| 04115 p53 signaling pathway                        | 1 |
| 04540 Gap junction                                 | 1 |
| 04621 NOD-like receptor signaling pathway          | 1 |
| 04660 T cell receptor signaling pathway            | 1 |
| 04662 B cell receptor signaling pathway            | 1 |
| 04664 Fc epsilon RI signaling pathway              | 1 |
| 04911 Insulin secretion                            | 1 |
| 04912 GnRH signaling pathway                       | 1 |
| 04914 Progesterone-mediated oocyte maturation      | 1 |
| 04917 Prolactin signaling pathway                  | 1 |
| 04970 Salivary secretion                           | 1 |
| 04971 Gastric acid secretion                       | 1 |
| 04973 Carbohydrate digestion and absorption        | 1 |
| 04962 Vasopressin-regulated water reabsorption     | 1 |
| 04960 Aldosterone-regulated sodium reabsorption    | 1 |
| 04964 Proximal tubule bicarbonate reclamation      | 1 |
| 04966 Collecting duct acid secretion               | 1 |
| 04726 Serotonergic synapse                         | 1 |
| 04626 Plant-pathogen interaction                   | 1 |
| 05204 Chemical carcinogenesis                      | 1 |
| 05212 Pancreatic cancer                            | 1 |
| 05216 Thyroid cancer                               | 1 |
| 05217 Basal cell carcinoma                         | 1 |
| 05223 Non-small cell lung cancer                   | 1 |
| 05320 Autoimmune thyroid disease                   | 1 |
| 05330 Allograft rejection                          | 1 |
| 05332 Graft-versus-host disease                    | 1 |
| 05340 Primary immunodeficiency                     | 1 |
| 05016 Huntington's disease                         | 1 |
| 05030 Cocaine addiction                            | 1 |
| 05031 Amphetamine addiction                        | 1 |
| 05034 Alcoholism                                   | 1 |
| 04940 Type I diabetes mellitus                     | 1 |
| 04930 Type II diabetes mellitus                    | 1 |
| 05110 Vibrio cholerae infection                    | 1 |
| 05131 Shigellosis                                  | 1 |
| 05134 Legionellosis                                | 1 |
